1 **Deficiency in cytosine DNA methylation leads to high chaperonin expression and**  
2 **tolerance to aminoglycosides in *Vibrio cholerae***

3

4 André Carvalho<sup>1,2</sup>, Didier Mazel<sup>1\*</sup>, Zeynep Baharoglu<sup>1\*</sup>

5

6 <sup>1</sup> Département Génomes et Génétique, Institut Pasteur, UMR3525, CNRS, Unité Plasticité  
7 du Génome Bactérien, Paris, France

8 <sup>2</sup> Sorbonne Université, Collège doctoral, F-75005 Paris, France

9

10 \* corresponding authors, [mazel@pasteur.fr](mailto:mazel@pasteur.fr), [zeynep.baharoglu@pasteur.fr](mailto:zeynep.baharoglu@pasteur.fr)

11

12

13

14

15

16

17

18

19

20

21

22

23

24 **ABSTRACT**

25

26 Antibiotic resistance has become a major global issue. Understanding the molecular  
27 mechanisms underlying microbial adaptation to antibiotics is of keen importance to fight  
28 Antimicrobial Resistance (AMR). Aminoglycosides are a class of antibiotics that target the  
29 small subunit of the bacterial ribosome, disrupting translational fidelity and increasing the  
30 levels of misfolded proteins in the cell. In this work, we investigated the role of VchM, a  
31 DNA methyltransferase, in the response of the human pathogen *Vibrio cholerae* to  
32 aminoglycosides. VchM is a *V. cholerae* specific orphan m5C DNA methyltransferase that  
33 generates cytosine methylation at 5'-RCCGGY-3' motifs. We show that deletion of *vchM*,  
34 although causing a growth defect in absence of stress, allows *V. cholerae* cells to cope with  
35 aminoglycoside stress at both sub-lethal and lethal concentrations of these antibiotics.  
36 Through transcriptomic and genetic approaches, we show that *groESL-2* (a specific set of  
37 chaperonin-encoding genes located on the second chromosome of *V. cholerae*), are  
38 upregulated in cells lacking *vchM* and are needed for the tolerance of *vchM* mutant to lethal  
39 aminoglycoside treatment, likely by fighting aminoglycoside-induced misfolded proteins.  
40 Interestingly, preventing VchM methylation of the four RCGGY sites located in *groESL-2*  
41 region, leads to a higher expression of these genes in WT cells, showing that VchM  
42 modulates the expression of these chaperonins in *V. cholerae* directly through DNA  
43 methylation.

44

45

## 46 **AUTHOR SUMMARY**

47

48 Bacteria are organisms with a remarkable ability to adapt to several stress conditions,  
49 including to the presence of antibiotics. The molecular mechanisms underlying such  
50 adaptation lead, very often, to phenomena like antimicrobial tolerance and resistance,  
51 responsible for the frequent failure of antibiotic treatment. The study of these molecular  
52 mechanisms is thus an important tool to understand development of antimicrobial  
53 resistance in bacteria. In this work, we show that abrogating cytosine DNA methylation in  
54 *Vibrio cholerae* increases its tolerance to aminoglycosides, a class of antibiotics that cause  
55 protein misfolding. DNA methylation is known to affect gene expression and regulate  
56 several cellular processes in bacteria. Here we provide evidence that DNA methylation also  
57 has a more direct role in controlling antibiotic susceptibility in bacteria. Consequently, the  
58 study of bacterial DNA methyltransferases and DNA methylation should not be overlooked  
59 when addressing the problem of antimicrobial tolerance/resistance.

60

## 61 **INTRODUCTION**

62 In the past decades, the over/misuse and large-scale production of antibiotics has  
63 created a serious ecological problem with important consequences for the emergence of  
64 antimicrobial resistance (AMR). In fact, a large proportion of the antibiotics ingested are  
65 released intact in the environment (1, 2) and found at trace levels or as gradients in various  
66 environments (3, 4). Hence, in these environments, one can find the presence of very low

67 doses of drugs commonly referred as subMIC, i.e. under the MIC (Minimal Inhibitory  
68 Concentration). Although not enough to kill or prevent the growth of bacterial populations,  
69 subMIC doses of antibiotics are proposed to work as signaling molecules (5) and trigger  
70 important stress mechanisms that often result in development of antibiotic resistance (4,  
71 6–8). We have previously shown that subMIC of antibiotics, such as aminoglycosides, trigger  
72 common and specific stress responses in Gram-negative bacteria (9, 10).

73         Aminoglycosides (AGs) are positively charged molecules that bind 16S rRNA at the  
74 30S ribosomal subunit and negatively affect translation. Specifically, AGs (e.g. tobramycin,  
75 streptomycin, kanamycin, gentamicin and neomycin) are known to disrupt translational  
76 fidelity and increase the levels of mistranslation, i.e. the misincorporation of certain amino  
77 acids in proteins (11, 12). In turn, high levels of mistranslation result in the production and  
78 accumulation of aberrant proteins in the cell, which contribute to the collapse of important  
79 cell processes and ultimately lead to cell death (13, 14).

80         *V. cholerae* is a water-borne gram-negative bacterium, human pathogen and the  
81 causative agent of cholera disease. As part of its life cycle, *V. cholerae* often transits  
82 between the human gut and the external environment where it can find low doses of  
83 antibiotics. During our studies to better understand adaption of *V. cholerae* to  
84 aminoglycosides (15), we observed that a mutant of a *V. cholerae*'s specific DNA  
85 methyltransferase (*vca0198* - VchM) was less susceptible to aminoglycosides than its  
86 isogenic WT strain, suggesting that DNA methylation could play a role in *V. cholerae*  
87 adaptation to AGs. *vchM* codes for an Orphan m5C DNA methyltransferase that causes DNA  
88 methylation at 5'-RCCGGY-3' motifs (16). DNA methylation is catalyzed by enzymes called

89 DNA methyltransferases (DNA MTases) that transfer a methyl group from S-adenosyl-L  
90 methionine (SAM) to adenine and cytosine in specific DNA motifs (17, 18). As a result, one  
91 can find the existence of small amounts of N6-methyl-adenine (6mA), C5-methyl-cytosine  
92 (5mC) and N4-methyl-cytosine (4mC) in the DNA of both eukaryotes and prokaryotes. In  
93 bacteria, the existence of such modified DNA bases have been shown to play a critical role  
94 in processes such as protection against invasive DNA, DNA replication and repair, cell cycle  
95 regulation and control of gene expression (19–23).

96 While it was previously proposed that VchM plays a role in the cell envelope stress  
97 response of *V. cholerae* (23), no link between this DNA MTase and antibiotic stress has yet  
98 been established. Here, we show that deletion of *vchM* (although causing a growth defect  
99 in absence of stress) allows *V. cholerae* cells to better deal with the effect of  
100 aminoglycosides. In fact, not only the *vchM* mutant is a better competitor during growth in  
101 presence of subMIC doses of aminoglycosides, it is also more tolerant to killing by lethal  
102 doses of these antibiotics. Transcriptome analysis of a  $\Delta vchM$  strain revealed the  
103 upregulation of *groESL-2* genes, a specific set of chaperonin-encoding genes located on the  
104 second chromosome of *V. cholerae*. High expression of *groESL-2* genes (but not of  
105 chromosome one *groESL-1* homologues) determines the higher tolerance of  $\Delta vchM$  to  
106 lethal AG treatment, suggesting a new and specific role of *groESL-2* in managing AG-  
107 mediated proteotoxic stress. Interestingly, we observed the presence of four VchM motifs  
108 in *groESL-2* region. Preventing methylation of all these sites in the WT strain by disrupting  
109 such motifs results in increased expression of these genes. Intriguingly, the high expression  
110 of *groESL-2* does not seem to contribute to the competitive advantage of the  $\Delta vchM$  strain

111 grown under subMIC AG which suggests the involvement of additional players in the global  
112 response of  $\Delta vchM$  to aminoglycosides.

113

## 114 RESULTS

115

### 116 ***V. cholerae* cells lacking *vchM* cope better with subMIC doses of AGs**

117

118 In order to explore a possible role of *vchM* in the response of *V. cholerae* O1 El Tor  
119 N16961 to aminoglycosides, we constructed an in-frame deletion mutant of *vchM* by allelic  
120 replacement with an antibiotic resistance cassette, and compared its growth to the isogenic  
121 wild-type (WT) strain, in rich media, with or without increasing concentrations of subMIC  
122 tobramycin (Fig 1). As previously described (23), this mutant exhibits a reduced doubling  
123 rate when grown in monoculture in antibiotic free rich media. However, the difference in  
124 growth between WT and  $\Delta vchM$  strains observed in absence of antibiotics becomes  
125 gradually more negligible with increasing concentrations of subMIC TOB. At higher  
126 concentrations (90% of the MIC),  $\Delta vchM$  even displays a clear advantage over the WT (Fig  
127 1A). Importantly, a  $\Delta vchM$  strain harboring a low-copy number plasmid with *vchM* gene  
128 under the control of its own promoter behaves as the WT strain in absence of tobramycin  
129 and even slightly worse in presence of higher doses of this drug (Fig 1A), showing that the  
130 observed growth phenotypes are due to the absence of *vchM*.

131 Next, we asked whether the growth phenotype observed in monocultures was translatable  
132 to a higher relative fitness in co-cultures in the presence of subMIC doses of tobramycin and  
133 other AGs. For that, we competed both WT and  $\Delta vchM$  strains (both  $lacZ^+$ ) with an isogenic  
134  $\Delta lacZ$  mutant (initial ratio of 1:1), in MH or MH supplemented with subMIC concentrations  
135 (50% MIC) of the aminoglycosides tobramycin (TOB), gentamicin (GEN) and neomycin  
136 (NEO). We assessed relative fitness by plating cultures after 20 hours of growth and  
137 counting the final proportion of  $lacZ^+/lacZ^-$  colonies. Competition of WT against the  $lacZ^-$   
138 mutant served as a control to account for any effect of  $lacZ$  deletion on growth. Supporting  
139 the previous results in monocultures,  $\Delta vchM$  is outcompeted by the  $lacZ^-$  mutant in MH  
140 ( $\approx 10$ -fold difference) (Fig 1B). More importantly, in presence of low concentrations of  
141 aminoglycosides,  $\Delta vchM$  is either equally competitive or even displays a clear growth  
142 advantage over the reference strain (Fig 1B). Additionally, in order to test whether these  
143 results hold for drugs other than aminoglycosides we performed competitions in the  
144 presence of chloramphenicol (CAM) and the beta-lactam carbenicillin (CARB). Unlike AGs,  
145 the presence of low concentrations of these drugs did not increased the relative fitness of  
146 the  $\Delta vchM$  mutant.

147 Altogether, these results confirm that lack of  $vchM$  in *V. cholerae* negatively impacts growth  
148 in antibiotic-free media (23) but confers a selective advantage to *V. cholerae* in presence of  
149 subMIC doses of AGs (Fig 1). In order to test if deleting  $vchM$  affects the MIC of these drugs,  
150 we measured the MIC of both WT and  $\Delta vchM$  mutant and found no difference (Table 1).

151

152

153 **Table 1.** MICs ( $\mu\text{g/ml}$ ) of the different antibiotics tested for *V. cholerae* N16961 WT and  
154  $\Delta vchM$  strains

| Strain        | TOB | GEN | NEO | CAM | CARB |
|---------------|-----|-----|-----|-----|------|
| 155 WT        | 1-2 | 1   | 4   | 1   | 15   |
| $\Delta vchM$ | 1-2 | 1   | 4   | 1   | 7.5  |

156 TOB, tobramycin; GEN, gentamicin; NEO, neomycin; CAM, chloramphenicol; CARB, carbenicillin

157

158

### 159 **VchM deficiency promotes higher tolerance to lethal doses of aminoglycosides**

160

161 It has been previously shown that certain mutations affect functions conferring  
162 bacterial populations a tolerant phenotype towards a specific drug (24). Such bacterial  
163 populations can transiently withstand lethal doses of that drug without necessarily any  
164 impact on the MIC of the population (24).

165 To continue exploring the different susceptibility of the  $\Delta vchM$  strain to aminoglycosides  
166 we assessed the survival rate of *V. cholerae* WT and  $\Delta vchM$  strains during treatment with  
167 lethal doses of tobramycin and gentamicin at 20x and 10x the MIC, respectively (Fig 2).  
168 Given the inherent growth defect of VchM deficiency, we performed time-dependent killing  
169 curves on stationary phase cells, where both WT and  $\Delta vchM$  strains are no longer actively  
170 growing, excluding a possible link between growth rate and aminoglycoside lethality as  
171 previously shown (25). Strikingly, survival to both antibiotics was increased 10-1000 fold in  
172 the  $\Delta vchM$  mutant, suggesting that the absence of VchM allows *V. cholerae* to transiently  
173 withstand lethal doses of these aminoglycosides (Fig 2).



174 One crucial aspect that determines the efficacy of aminoglycoside treatment is the uptake  
175 of these drugs by the bacterial cell. This process is energy dependent and requires a  
176 threshold membrane potential (26). We used a previously reported assay that measures  
177 cell fluorescence after incubation with fluorescent-marked neomycin (neo-cy5) (27) as a  
178 proxy for aminoglycoside uptake. We did not observe any difference in fluorescence  
179 between WT and  $\Delta vchM$  mutant strains (S1 Fig). Thus, differential uptake of  
180 aminoglycosides is unlikely the reason for the increased tolerance to these drugs in  $\Delta vchM$ .

181

182

### 183 **A specific set of chaperonins is upregulated in $\Delta vchM$ cells**

184

185 To understand the high tolerance to aminoglycosides observed in  $\Delta vchM$ , we  
186 performed RNA-seq on stationary phase cells of WT and  $\Delta vchM$  strains grown in rich, stress-  
187 free media. The analysis of the transcriptome of  $\Delta vchM$  *V. cholerae* O1 El Tor N16961 strain  
188 reveals the significant upregulation (fold change  $\geq 2$ ,  $p < 0.01$ ) and downregulation (fold  
189 change  $\leq -2$ ,  $p < 0.01$ ) of 68 and 53 genes, respectively (S1 Table). Among the differentially  
190 expressed, we found four genes directly involved in protein folding to be upregulated in  
191  $\Delta vchM$  strain. Those are the molecular chaperones GroEL and co-chaperonins GroES (Table  
192 2). In many bacterial species, GroEL and its co-chaperonin GroES form a molecular machine  
193 essential for folding of large newly synthesized proteins also helping re-folding of proteins  
194 damaged by proteotoxic stress (28). Interestingly, overexpression of GroES and GroEL

195 proteins was found to promote short-term tolerance to aminoglycoside-induced protein  
196 misfolding in *E. coli* (29).

**Table 2.** Protein folding and stabilization genes upregulated in  $\Delta vchM$  (fold change > 2, p-value < 0.01)

| Locus   | Name     | Fold change<br>( $\Delta vchM$ /WT) | Annotation                 |
|---------|----------|-------------------------------------|----------------------------|
| vc2665  | groEL-1  | <b>2.24</b>                         | Chaperonin, 60-kDa subunit |
| vca0820 | groEL-2  | <b>3.54</b>                         | Chaperonin, 60-kDa subunit |
| vc2664  | groES -1 | <b>2.60</b>                         | Chaperonin, 10-kDa subunit |
| vca0819 | groES-2  | <b>6.78</b>                         | Chaperonin, 10-kDa subunit |

197

198 *V. cholerae* is one of, at least, seven *Vibrio* species harboring two copies of *groES* –  
199 *groEL* (*groESL*) bicistronic operons (30). Whereas *groESL-1* is encoded in chromosome 1  
200 (*vc2664-vc2665*), *groESL-2* is located in chromosome 2 (*vca0819-0820*) (Fig 3A) (30). Based  
201 on our RNA-seq data, the latter manifested a larger fold change (Table 2). In order to  
202 confirm differential expression of these genes in  $\Delta vchM$ , we measured *groES-1* and *groES-*  
203 *2* relative gene expression in exponential and stationary phase cells of WT and mutant  
204 strains, using digital qRT-PCR with the housekeeping *gyrA* gene as reference (31). The  
205 results confirm a higher induction of *groES-2* genes in both exponential and stationary  
206 phase  $\Delta vchM$  cells with a fold change (over the WT) of ca. 10X and 5X, respectively (Fig 3B).  
207 However, *groES-1* fold change was only slightly increased in exponential and unnoticeable  
208 in stationary phase.

209 Induction of *groESL* genes is usually associated to perturbations in proteostasis  
210 which leads to activation of the heat-shock response (32). Indeed, expression of both  
211 *groESL-1* and *groESL-2* is controlled by the heat-shock alternative sigma factor RpoH in *V.*

212 *cholerae* (33). However, the upregulation of *groESL-2* genes in  $\Delta vchM$  cells is likely  
213 independent of heat-shock activation as i) we do not observe any other genes of the heat-  
214 shock regulon being upregulated in the mutant (for example, *dnaKJ/grpE*, *clpB*, *ibpAB*) and  
215 ii) expression of *groESL-1* is not as increased as expression of *groESL-2* (Fig 3B).

216 Altogether, these results confirm that in absence of *VchM*, expression of *groESL-2*  
217 genes is markedly increased in *V. cholerae* and suggest that regulation of *groESL-2* operon  
218 in the  $\Delta vchM$  mutant can be independent of heat-shock response.

219

## 220 **Deletion of *groESL-2* operon abolishes $\Delta vchM$ high tolerance to lethal doses of tobramycin**

221 In bacteria that harbor a single copy of this operon, GroESL are essential proteins for  
222 cell viability (34). However, possible redundancy between *groESL-1* and *groESL-2* could  
223 allow for the deletion of one or the other operon in *V. cholerae*. Thus, we attempted to  
224 delete *groESL-1* and *groESL-2* from *V. cholerae* WT and  $\Delta vchM$  strains. While  $\Delta groESL-2$  and  
225  $\Delta vchM groESL-2$  strains were easily obtained, we could not manage to delete *groESL-1* in  
226 any background despite several attempts. Moreover, deletion of *groESL-2* did not affect the  
227 growth of *V. cholerae* in rich medium (Fig 4A). Respectively, GroES-1 and GroEL-1 share 80%  
228 and 87% amino acid identity with the only and essential GroES and GroEL proteins of *E. coli*,  
229 but lower (66% and 76%) amino acid identity with GroES-2 and GroEL-2 (S2 Fig). These  
230 observations suggest that i) GroESL-1 (but not GroESL-2) is essential for *V. cholerae* viability  
231 and ii) GroESL-1 is probably the main housekeeping chaperonin system while the divergent  
232 GroESL-2 could act synergistically in response to high levels of misfolding or having specific

233 substrates upon protein damage caused by specific stresses. Surprisingly, competition of  
234  $\Delta groESL-2$  with a lacZ' strain shows that loss of these proteins is not detrimental for growth  
235 of *V. cholerae* in presence of subMIC TOB (S3A Fig). Similarly, survival of the  $\Delta groESL-2$  strain  
236 to lethal doses of TOB does not differ from that of the WT (S3B Fig). However, these genes  
237 are intrinsically highly expressed in  $\Delta vchM$  strain, where they may confer a selective  
238 advantage in presence of AG stress. In this case, deletion of *groESL-2* in  $\Delta vchM$  background  
239 would affect the mutant's tolerance. Indeed, when we compared the survival to lethal AG  
240 treatment of  $\Delta vchM$  to that of a  $\Delta vchM groESL-2$  double mutant, we found that the absence  
241 of *groESL-2* abolishes high tolerance to tobramycin and gentamicin in  $\Delta vchM$  (Fig 4B),  
242 without affecting growth in absence of stress (Fig 4A). These results show that the higher  
243 expression of *groESL-2* is required for the high tolerance of the  $\Delta vchM$  mutant to lethal AG  
244 treatment.

245 We then tested whether the high tolerance of this mutant relies on general higher  
246 levels of chaperonins or if it specifically linked to GroESL-2 chaperonins. We thus tried to  
247 complement the  $\Delta vchM groESL-2$  mutant by ectopically expressing *groESL-1* or *groESL-2*  
248 and assessed survival to lethal doses of AGs. Strikingly, only overexpression of *groESL-2* is  
249 able to promote survival levels similar to those observed in  $\Delta vchM$  (Fig 4C), suggesting a  
250 specific role for GroESL-2 in managing AG-mediated proteotoxic stress in *V. cholerae* cells  
251 lacking VchM. Interestingly, we observed no difference in the relative fitness of  $\Delta vchM$  and  
252  $\Delta vchM groESL-2$  mutants in competitions in presence of subMIC doses of tobramycin, which  
253 shows that *groESL-2* it is not implicated in  $\Delta vchM$  higher relative fitness during growth in  
254 subMIC AGs (Fig 4D).

## 255 **VchM controls *groESL-2* expression through direct DNA methylation**

256           Knowing the role of VchM in regulating gene expression in *V. cholerae* (23), we asked  
257 whether VchM controls *groESL* expression directly through DNA methylation. VchM  
258 methylates the first cytosine in 5'-RCCGGY-3' motifs (16). This prompted us to search for  
259 such motifs in both *groESL* operons. While we couldn't detect any of these sites along the  
260 *groESL-1* locus, we found a total of four VchM motifs in *groESL-2* region: motif #1 within the  
261 5' UTR of the operon, 47 bp away from the initiation codon; motif #2 is within the coding  
262 region of *groES-2* while motifs #3 and #4 are located within the coding region of *groEL-2*  
263 (Fig 5A). We hypothesized that the methylation state of these motifs could modulate the  
264 transcription of *groESL-2* genes. To test this, we generated a mutant by replacing all RCCGGY  
265 motifs in *groESL-2* region by non-consensus motifs but maintaining the amino acid  
266 sequence of GroESL-2 proteins intact (Fig 5A, mut#1-4). Additionally, we created a mutant  
267 where only the RCCGGY #1 was altered in order to investigate if this site, for being in the  
268 regulatory region of this operon, had a stronger contribution in modulating gene expression  
269 (Fig 5A, mut#1). We then measured *groES-2* expression in both mutants and observed that  
270 disruption of RCCGGY #1 lead to a very weak increase in *groES-2* expression relative to the  
271 WT, while disruption of all four sites led to a significantly higher expression of this gene (Fig  
272 5B). We additionally tested *groEL-2* expression and observed similar results (S4 Fig).  
273 Supporting our hypothesis that this regulation is methylation-dependent, we did not  
274 observe any difference in *groES-2* or *groEL-2* expression when we mutated sites #1-4 in the  
275  $\Delta vchM$  background (S4 Fig). It is worth mentioning that, in these experiments, the  
276 expression of *groES-2* in the  $\Delta vchM$  strain was consistently higher than in the WT mut#1-4

277 (Fig 5B) suggesting that an additional factor, in synergy with the methylation of RCCGGY  
278 sites, may control expression of *groES-2*. Nonetheless, overall these results show that a  
279 specific set of chaperonin encoding genes is under the control of DNA cytosine methylation  
280 in *V. cholerae*, linking DNA methylation to modulation of chaperonin expression and  
281 tolerance to antibiotics.

282

283

## 284 **DISCUSSION**

285 Antimicrobial resistance (AMR) is currently one of the biggest threats to global  
286 health (35). It is thus urgent not only to find new and alternative ways to fight bacterial  
287 infections but also to understand how bacteria adapt to the presence of antibiotics and  
288 study the molecular mechanisms they use to circumvent antibiotic action.

289 In this study, we establish a previously unknown link between VchM-mediated DNA  
290 methylation and aminoglycoside susceptibility in the human pathogen *V. cholerae*. VchM is  
291 a relatively understudied orphan DNA methyltransferase only found in *V. cholerae* species,  
292 known to methylate the first cytosine at 5'-RCCGGY-3' DNA motifs (16, 23). VchM is  
293 necessary for the optimal growth of *V. cholerae*, both *in vitro* and *in vivo*, and it was shown  
294 to repress the expression of a gene important for cell envelope stability through direct DNA  
295 methylation (23).

296 Here we show that despite the growth defect in stress-free medium, cells lacking  
297 VchM are also less susceptible to aminoglycoside toxicity. Specifically, we show that these

298 cells have a higher relative fitness in presence of low AG concentrations. The reason for this  
299 can be inferred from the growth curves in presence of subMIC TOB (Fig 1A) where it is clear  
300 that small increments in TOB concentration lead to a higher toxicity in the WT strain when  
301 compared to the  $\Delta vchM$ . Moreover, even though the MIC values for the tested AGs are the  
302 same in both strains,  $\Delta vchM$  displays a higher tolerance to lethal aminoglycoside treatment  
303 (Fig 2).

304 Aminoglycosides are a well-known class of antimicrobial drugs that cause disruption  
305 of the translation process and consequently protein misfolding (14, 36). The exact  
306 mechanism underlying the bactericidal activity of aminoglycosides has been subject of  
307 debate in the literature (37) but it is generally accepted that killing by AGs involves i) the  
308 uptake of the AG into the cytoplasm (11, 38, 39) and ii) membrane disruption mediated by  
309 insertion of misfolded proteins in the membrane as consequence of AG binding to the  
310 ribosomes and disruption of translational fidelity (11–13, 40). Indeed, mechanisms  
311 modulating aminoglycoside tolerance/resistance in different bacterial species (in  
312 exponential or stationary phase) have been shown to be associated either to AG uptake  
313 (41–44) or to translational fidelity and proteostasis (14, 29, 40, 45). Our results revealed a  
314 higher relative abundance of *groESL-2* transcripts in bacterial cells lacking VchM, which led  
315 us to hypothesize that such increased expression of these chaperonins could underlie the  
316 high tolerance to AGs observed in this mutant, as it had been previously observed in *E. coli*  
317 (29). In fact, we show that stationary phase cells lacking both *vchM* and *groESL-2* genes have  
318 similar or even lower tolerance to lethal AG treatment compared to the WT strain. However,  
319 we could not observe a significant increase in tolerance upon overexpression of *groESL-2* in

320 the WT strain (S5 Fig), suggesting that high *groESL-2* levels alone do not explain the high  
321 tolerance to lethal AG treatment. Instead, it is possible that high levels of GroESL-2  
322 chaperone system counteract AG-mediated misfolding of specific substrates present only  
323 in cells devoid of VchM.

324 *V. cholerae* harbors two copies of *groESL* operon in its genome, thus belonging to  
325 the group of 30% of bacterial species that contains multiple copies of these chaperonins  
326 (46, 47). An interesting question to ask is whether these extra copies of chaperonins are  
327 functionally redundant or have a more specialized role in the cell, as it had been observed  
328 for *Myxococcus xanthus* (46–48). Supporting the latter hypothesis, we show here that the  
329 high tolerance observed in  $\Delta vchM$  is dependent on the high expression of *groESL-2* but not  
330 on the high expression of *groESL-1* (Fig 4B). Amino acid identity comparison between these  
331 proteins suggests that *Vc* GroESL-1 is likely the orthologue of the housekeeping GroESL of  
332 *E. coli* whereas *Vc* GroESL-2, thought to have appeared by duplication in *V. cholerae* (30),  
333 differ equally from both (S2 Fig). Thus, we speculate that *V. cholerae* GroESL-2 constitutes  
334 an alternative chaperone system capable of helping the folding of specific substrates  
335 important for survival to specific stresses. Interestingly, even though essential for the higher  
336 tolerance to lethal aminoglycoside treatment, *groESL-2* is not involved in the increased  
337 relative fitness of the  $\Delta vchM$  mutant in presence of subMIC doses of aminoglycosides (Fig  
338 4C). This suggests that the mechanisms operating in  $\Delta vchM$  cells that increase their relative  
339 fitness during growth in subMIC AGs are not the same that increase their tolerance to lethal  
340 doses of these drugs. In fact, it has been recently shown that the type of translation errors  
341 occurring at lower streptomycin (another AG) concentrations differ from those found in



342 high concentrations of this aminoglycoside, with the latter being associated to a higher  
343 misfolding propensity (12). Thus, it seems plausible that, in  $\Delta vchM$  cells, the higher  
344 expression of *groESL-2* is likely to be more important at high concentrations of AGs, when  
345 the abundance of misfolded proteins tend to increase. The mechanisms driving  $\Delta vchM$   
346 higher relative fitness at lower doses of aminoglycosides remain to be elucidated in future  
347 work.

348 DNA methylation controls gene expression through modulation of protein-DNA  
349 interactions (49). In most of the cases, the methylated base interferes with the binding of  
350 transcription factors and/or the RNA polymerase at the regulatory region of a gene,  
351 affecting transcription (50–52). However, there is also evidence that the presence of  
352 methylated DNA bases that occur along the coding region of genes could also directly affect  
353 their expression in bacteria, even though the precise mechanism is still unknown (20, 22,  
354 23). In eukaryotes, cytosine methylation tends to repress gene expression. A recent study  
355 shedding light on how cytosine methylation affect DNA mechanical properties shows that  
356 cytosine methylation stabilizes the DNA helix and slows transcription in eukaryotic cells  
357 (53). Thus, a similar m5C-mediated transcriptional hindrance is likely to happen also in  
358 prokaryotes. Here we support this view by showing that abrogation of VchM-dependent  
359 methylation of cytosines at the four RCCGGY motifs in *groESL-2* region increased its  
360 expression in WT cells (Fig 5B). However, this is unlikely the sole mechanism responsible  
361 for the high expression of *groESL-2* genes in  $\Delta vchM$  cells, as this mutant has even higher  
362 expression levels of *groESL-2*. It is possible that the pleiotropic effects resulting from VchM

363 deficiency also affect, indirectly, the expression of these genes through regulation of a  
364 specific transcription factor.

365 Our work shows that a *V. cholerae* deletion mutant of the orphan DNA methyltransferase  
366 VchM have a general higher tolerance towards aminoglycosides. It remains to be explored  
367 whether *V. cholerae* WT cells can modulate VchM expression and, consequently, alter the  
368 levels of cytosine methylation. Bisulfite sequencing analysis of *V. cholerae* genome shows  
369 that all cytosines within RCCGGY motifs were methylated in *V. cholerae*, during exponential  
370 and stationary phases, with the exception of three of these sites which had been previously  
371 shown to be constantly undermethylated in this species (54). However, these studies were  
372 conducted in cells cultured in LB stress-free media or collected from frozen rabbit cecal  
373 fluid, and thus may not reflect the m5C profile of *V. cholerae* during other stress conditions.  
374 Moreover, bisulfite sequencing allows for cytosine methylation analysis of the total  
375 population at a specific time and thus it is not suitable to detect potential transient changes  
376 in small subpopulations of cells. Such changes could be mediated, for example, by altering  
377 the levels of VchM through gene expression. Little is known about *vchM* regulation but it  
378 was recently shown that the *V. cholerae* quorum sensing low density transcriptional  
379 regulator AphA is able to bind the *vchM* region (55) leaving the possibility that *vchM* may  
380 be regulated by quorum sensing. Moreover, *vchM* was previously found to be differentially  
381 expressed between different stages of human infection (56), suggesting the possibility that  
382 modulation of cytosine methylation levels can be adaptative during *V. cholerae*'s life cycle.  
383 In line with our work, lowering VchM levels could lead to a trade-off, where low m5C levels

384 would be detrimental for fitness in stress-free contexts, but highly advantageous in  
385 presence of specific stress conditions, such as antibiotic exposure.

386

## 387 **MATERIALS AND METHODS**

388

### 389 **Strains, media and culture conditions**

390 *V. cholerae* was routinely cultured at 37°C in Mueller-Hinton (MH) medium. Plasmids were  
391 introduced in *V. cholerae* by electrotransformation. Strains containing the pSC101 plasmid  
392 were grown in presence of 100 µg/mL carbenicillin for plasmid maintenance. All *V. cholerae*  
393 mutant strains are derived from *Vibrio cholerae* serotype O1 biotype El Tor strain N16961  
394 hapR+. Mutants were constructed by homologous recombination after natural  
395 transformation or with a conjugative suicide plasmid as previously described (15, 57–59).  
396 Primers, strains and plasmids used in this study, and their constructions, are listed in Table  
397 S2. For routine cloning we used chemically competent *E. coli* One Shot® TOP10 (Invitrogen).  
398 All strains and plasmids were confirmed by sanger sequencing.

### 399 **Mutation of RCCGGY sites #1-4 in *groESL-2* region**

400 In order to mutate all four RCCGGY sites present in *groESL-2* (*vca0819-0820*) region we  
401 generated a DNA fragment (S2 Table) with these sites containing the following nucleotide  
402 changes: #1- ACCGGC changed to ATCGGC; #2- ACCGGC changed to ACGGGC; #3- GCCGGC  
403 changed to GCGGGC and #4- ACCGGC changed to ACGGGC. This fragment was then

404 introduced in *V. cholerae* at the endogenous locus by allelic replacement as described in  
405 Table S2.

406

#### 407 **Growth curves**

408 Overnight cultures from single colonies were diluted 1:100 in Mueller-Hinton (MH) rich  
409 media or MH + subMIC antibiotics at different concentrations, in 96-well microplates. OD<sub>600</sub>  
410 was measured in a Tecan Infinite plate reader at 37°C, with agitation for 20 hours.  
411 Measurements were taken every 10 minutes.

412

413

#### 414 **MIC determination**

415 MICs were determined by microtiter broth dilution method (60) with an initial inoculum  
416 size of 10<sup>5</sup> CFUs/mL. The MIC was interpreted as the lowest antibiotic concentration  
417 preventing visible growth.

#### 418 **Neo-Cy5 uptake**

419 Quantification of fluorescent neomycin (Neo-cy5) uptake was performed as described (61).  
420 Neo-cy5 is an aminoglycoside coupled to the fluorophore Cy5, and has been shown to be  
421 active against Gram- bacteria (27). Briefly, overnight cultures were diluted 100-fold in rich  
422 MOPS (Teknova EZ rich defined medium). When the bacterial cultures reached an OD<sub>600</sub> of

423 0.25, they were incubated with 0.4  $\mu$ M of Cy5 labeled Neomycin for 15 minutes at 37°C. 10  
424  $\mu$ L of the incubated culture were then used for flow cytometry, diluting them in 250  $\mu$ L of  
425 PBS before reading fluorescence. Flow cytometry experiments were performed as  
426 described (62). For each experiment, 100000 events were counted on the Miltenyi  
427 MACSquant device.

428

### 429 **Competitions experiments**

430 Overnight cultures from single colonies of lacZ<sup>-</sup> and lacZ<sup>+</sup> strains were washed in PBS  
431 (Phosphate Buffer Saline) and mixed 1:1 (500 $\mu$ l + 500 $\mu$ l). At this point 100 $\mu$ l of the mix were  
432 serial diluted and plated in MH agar supplemented with X-gal (5-bromo-4-chloro-3-indolyl-  
433  $\beta$ -D-galactopyranoside) at 40  $\mu$ g/mL to assess T0 initial 1:1 ratio. At the same time, 10  $\mu$ l  
434 from the mix were added to 2 mL of MH or MH supplemented with subMIC tobramycin at  
435 0.6 $\mu$ g/mL and incubated with agitation at 37°C for 20 hours. Cultures were then diluted and  
436 plated in MH agar plates supplemented with X-gal. Plates were incubated overnight at 37°C  
437 and the number of blue and white CFUs was assessed. Competitive index was calculated by  
438 dividing the number of blue CFUs (lacZ<sup>+</sup> strain) by the number of white CFUs (lacZ<sup>-</sup> strain).

439

### 440 **Survival assays**

441 Bacterial cultures from single colonies were cultured at 37°C for 16 h with agitation in 10  
442 mL of MH medium. Aliquots from these cultures were removed, serial diluted and plated in  
443 MH agar plates to assess CFUs formation prior antibiotic treatment (T0). In addition, 5 mL

444 of these aliquots were subjected to antibiotic treatment and incubated with agitation at  
445 37°C. At the indicated time points, 500uL of these cultures were collected, washed in PBS,  
446 serial diluted and plated in MH agar plates. The plates were then incubated overnight at  
447 37°C. Survival at each time point was determined by dividing the number of CFUs/mL at  
448 that time point by the number of CFUs/mL prior treatment. Antibiotics were used at the  
449 following final concentrations: 20 µg/mL Tobramycin (TOB) and 10 µg/mL Gentamicin  
450 (GEN). Experiments were repeated at least two to three times.

451

#### 452 **Digital qRT-PCR**

453 For RNA extraction, overnight cultures of three biological replicates of strains of interest  
454 were diluted 1:1000 in MH media and grown with agitation at 37°C until an OD<sub>600</sub> of 0.3  
455 (exponential phase) or an OD<sub>600</sub> of 1.0 or 2.0 (stationary phase). 0.5 mL of these cultures  
456 were centrifuged and supernatant removed. Pellets were homogenized by resuspension  
457 with 1.5 mL of cold TRIzol™ Reagent. Next, 300 µL chloroform were added to the samples  
458 following mix by vortexing. Samples were then centrifuged at 4°C for 10 minutes. Upper  
459 (aqueous) phase was transferred to a new 2mL tube and mixed with 1 volume of 70%  
460 ethanol. From this point, the homogenate was loaded into a RNeasy Mini kit (Qiagen)  
461 column and RNA purification proceeded according to the manufacturer's instructions.  
462 Samples were then subjected to DNase treatment using TURBO DNA-free Kit (Ambion)  
463 according to the manufacturer's instructions. RNA concentration of the samples was

464 measured with NanoDrop™ spectrophotometer and diluted to a final concentration of 1-10  
465 ng/μL.

466 qRT-PCR reactions were prepared with 1 μL of diluted RNA samples using the qScript™ XLT  
467 1-Step RT-qPCR ToughMix (Quanta Biosciences, Gaithersburg, MD, USA) within Sapphire  
468 chips. Digital PCR was conducted on a Naica Geode (programmed to perform the sample  
469 partitioning step into droplets, followed by the thermal cycling program suggested in the  
470 user's manual. Primer and probe sequences used in digital qRT-PCR reaction are listed in  
471 Table S3. Image acquisition was performed using the Naica Prism3 reader. Images were  
472 then analyzed using Crystal Reader software (total droplet enumeration and droplet quality  
473 control) and the Crystal Miner software (extracted fluorescence values for each droplet).  
474 Values were normalized against expression of the housekeeping gene *gyrA* as previously  
475 described (31).

476

#### 477 **RNA-seq**

478 For RNA extraction, overnight cultures of three biological replicates of WT and  $\Delta vchM$   
479 strains were diluted 1:100 in MH medium and grown with agitation at 37°C until cultures  
480 reach an OD<sub>600</sub> of 2.0. Total RNA extraction, library preparation, sequencing and analysis  
481 were performed as previously described (63). The data for this RNA-seq study has been  
482 submitted in the GenBank Sequence Read Archive (SRA) under project number  
483 PRJNA509113.

484

485 **ACKNOWLEDGMENTS**

486 We are thankful to Manon Lang for her valuable help with the neo-cy5 uptake experiments  
487 and Sebastian Aguilar Pierlé for all the help with RNAseq analysis. We also thank Evelyne  
488 Krin for help with molecular cloning procedures and João Gama for helpful comments on  
489 the manuscript.

490

491 **FIGURE CAPTIONS**

492 **Fig 1. *V. cholerae* N16961  $\Delta$ *rchM* is less susceptible to subMIC aminoglycosides** **A.** Growth  
493 curves in absence (MH) or presence of subMIC doses of tobramycin. Bars represent SD (n=3)  
494 **B.** *In vitro* competitions of WT and mutant strains against isogenic  $\Delta$ *lacZ* reference strain in  
495 absence or presence of different antibiotics at subMIC concentrations (TOB, 0.6  $\mu$ g/ml; GEN,  
496 0.5  $\mu$ g/ml; NEO, 2.0  $\mu$ g/ml; CAM, 0.4  $\mu$ g/ml; CARB, 2.5  $\mu$ g/ml). Box plots indicate the median  
497 and the 25<sup>th</sup> and 75<sup>th</sup> percentiles; whiskers indicate the min and max values (n=6).

498 **Fig 2.  $\Delta$ *rchM* strain is more tolerant to lethal aminoglycoside treatment.** Survival of  
499 stationary-phase WT and  $\Delta$ *rchM* cells exposed to lethal doses of tobramycin (TOB) **(A)**, and  
500 gentamicin (GEN) **(B)**. Survival represents the number of bacteria (CFU/mL) after treatment  
501 divided by the initial number of bacteria prior treatment. Means and SD are represented,  
502 n=3.

503 **Fig 3. *groESL-2* operon is upregulated in  $\Delta$ *rchM* strain.** **A.** Schematic representation of both  
504 *groESL* operons in *V. cholerae*. The four RCCGGY sites present along the *groESL-2* region are  
505 represented by the inverted orange triangles. **B.** Fold change ( $\Delta$ *rchM*/WT) of the relative



506 expression levels of *groES-1* and *groES-2* in cultures at exponential phase (Exp, OD<sub>600</sub> ≈ 0.3)  
507 or stationary phase (Stat, OD<sub>600</sub> ≈ 1.8-2.0). Means and SD are represented, n=3.

508 **Fig 4. *groESL-2* is needed for the increased tolerance of  $\Delta vchM$  to lethal AG treatment. A.**

509 Growth curves in MH medium. Means and SD are represented, n=3. **B.** Survival of

510 stationary-phase WT and  $\Delta groESL-2$  cells exposed to lethal aminoglycoside treatment for 7

511 hours. Box plots indicate the median and the 25<sup>th</sup> and 75<sup>th</sup> percentiles; whiskers indicate the

512 min and max values (n=6 from two independent experiments). **C.** Survival (after 7 hours AG

513 treatment) of  $\Delta vchM groESL-2$  double mutant harboring an empty plasmid or a plasmid

514 expressing either *groESL-1* or *groESL-2*, relative to survival of the  $\Delta vchM$  with the control

515 plasmid. Box plots indicate the median and the 25<sup>th</sup> and 75<sup>th</sup> percentiles; whiskers indicate

516 the min and max values (n=6 from two independent experiments). In **B** and **C** statistically

517 significant differences were determined using Friedman's test with Dunn's post-hoc test for

518 multiple comparisons. \* P<0.05, \*\* P<0.01, ns = not significant. **D.** *In vitro* competitions of

519  $\Delta vchM$  and  $\Delta vchM groESL-2$  double mutant strains against isogenic  $\Delta lacZ$  reference strain

520 in absence or presence of subMIC TOB, 0.6  $\mu$ g/ml; Error bars indicate SD (n=6).

521 **Fig 5. Disrupted VchM sites in *groESL-2* region leads to increased gene expression in the**

522 **WT. A.** Schematic representation of mutants with abrogated VchM sites. **B.** Relative

523 expression of *groES-2* in the different strains at OD<sub>600</sub> of 1.0. Box plots indicate the median

524 and the 25<sup>th</sup> and 75<sup>th</sup> percentiles; whiskers indicate the min and max values (n= 5). Statistical

525 significance was determined by Kruskal-Wallis test with Dunn's post-hoc test for multiple

526 comparisons. \* P<0.05, \*\* P<0.01, ns = not significant

527    **REFERENCES**

- 528    1.    Liu YC, Huang WK, Huang TS, Kunin CM. 1999. Detection of antimicrobial activity in  
529            urine for epidemiologic studies of antibiotic use. *J Clin Epidemiol*.
- 530    2.    Haggard BE, Bartsch LD. 2009. Net Changes in Antibiotic Concentrations Downstream  
531            from an Effluent Discharge. *J Environ Qual*.
- 532    3.    Fick J, Söderström H, Lindberg RH, Phan C, Tysklind M, Larsson DGJ. 2009.  
533            Contamination of surface, ground, and drinking water from pharmaceutical  
534            production. *Environ Toxicol Chem*.
- 535    4.    Andersson DI, Hughes D. 2014. Microbiological effects of sublethal levels of  
536            antibiotics. *Nat Rev Microbiol*.
- 537    5.    Davies J, Spiegelman GB, Yim G. 2006. The world of subinhibitory antibiotic  
538            concentrations. *Curr Opin Microbiol* 9:445–453.
- 539    6.    Wistrand-Yuen E, Knopp M, Hjort K, Koskiniemi S, Berg OG, Andersson DI. 2018.  
540            Evolution of high-level resistance during low-level antibiotic exposure. *Nat Commun*.
- 541    7.    Jørgensen KM, Wassermann T, Jensen PØ, Hengzuang W, Molin S, Høiby N, Ciofu O.  
542            2013. Sublethal ciprofloxacin treatment leads to rapid development of high-level  
543            ciprofloxacin resistance during long-term experimental evolution of *Pseudomonas*  
544            [\*aeruginosa\*](#). *Antimicrob Agents Chemother*.
- 545    8.    Gullberg E, Cao S, Berg OG, Ilbäck C, Sandegren L, Hughes D, Andersson DI. 2011.  
546            Selection of resistant bacteria at very low antibiotic concentrations. *PLoS Pathog*.

- 547 9. Baharoglu Z, Mazel D. 2011. *Vibrio cholerae* triggers SOS and mutagenesis in  
548 response to a wide range of antibiotics: A route towards multiresistance. *Antimicrob*  
549 *Agents Chemother.*
- 550 10. Baharoglu Z, Babosan A, Mazel D. 2014. Identification of genes involved in low  
551 aminoglycoside-induced SOS response in *Vibrio cholerae*: A role for transcription  
552 stalling and Mfd helicase. *Nucleic Acids Res.*
- 553 11. Davis BD. 1987. Mechanism of bactericidal action of aminoglycosides. *Microbiol Rev.*
- 554 12. Wohlgemuth I, Garofalo R, Samatova E, Günenç AN, Lenz C, Urlaub H, Rodnina M V.  
555 2021. Translation error clusters induced by aminoglycoside antibiotics. *Nat Commun.*
- 556 13. Kohanski MA, Dwyer DJ, Wierzbowski J, Cottarel G, Collins JJ. 2008. Mistranslation of  
557 Membrane Proteins and Two-Component System Activation Trigger Antibiotic-  
558 Mediated Cell Death. *Cell* 135:679–690.
- 559 14. Ling J, Cho C, Guo LT, Aerni HR, Rinehart J, Söll D. 2012. Protein Aggregation Caused  
560 by Aminoglycoside Action Is Prevented by a Hydrogen Peroxide Scavenger. *Mol Cell*  
561 48:713–722.
- 562 15. Negro V, Krin E, Pierlé SA, Chaze T, Gianetto QG, Kennedy SP, Matondo M, Mazel D,  
563 Baharoglu Z. 2019. RadD contributes to R-Loop avoidance in Sub-MIC tobramycin.  
564 *MBio.*
- 565 16. Banerjee S, Chowdhury R. 2006. An orphan {DNA} (cytosine-5-)-methyltransferase in  
566 *Vibrio cholerae* 152:1055–1062.

- 567 17. Fujimoto D, Srinivasan PR, Borek E. 1965. On the Nature of the Deoxyribonucleic Acid  
568 Methylases. Biological Evidence for the Multiple Nature of the Enzymes.  
569 Biochemistry.
- 570 18. Casadesús J, Low D. 2006. Epigenetic Gene Regulation in the Bacterial World.  
571 Microbiol Mol Biol Rev.
- 572 19. Sánchez-Romero MA, Casadesús J. 2020. The bacterial epigenome. Nat Rev  
573 Microbiol.
- 574 20. Kumar S, Karmakar BC, Nagarajan D, Mukhopadhyay AK, Morgan RD, Rao DN. 2018.  
575 N4-cytosine DNA methylation regulates transcription and pathogenesis in  
576 *Helicobacter pylori*. Nucleic Acids Res.
- 577 21. Estibariz I, Overmann A, Ailloud F, Krebs J, Josenhans C, Suerbaum S. 2019. The core  
578 genome m5C methyltransferase JHP1050 (M.Hpy99III) plays an important role in  
579 orchestrating gene expression in *Helicobacter pylori*. Nucleic Acids Res 47:2336–  
580 2348.
- 581 22. Militello KT, Simon RD, Qureshi M, Maines R, van Horne ML, Hennick SM, Jayakar SK,  
582 Pounder S. 2012. Conservation of Dcm-mediated cytosine DNA methylation in  
583 *Escherichia coli*. FEMS Microbiol Lett.
- 584 23. Chao MC, Zhu S, Kimura S, Davis BM, Schadt EE, Fang G, Waldor MK. 2015. A Cytosine  
585 Methyltransferase Modulates the Cell Envelope Stress Response in the Cholera  
586 Pathogen 11:e1005666.

- 587 24. Brauner A, Fridman O, Gefen O, Balaban NQ. Distinguishing between resistance,  
588 tolerance and persistence to antibiotic treatment. *Nat Publ Gr*.
- 589 25. Haugan MS, Løbner-Olesen A, Frimodt-Møller N. 2019. Comparative activity of  
590 ceftriaxone, ciprofloxacin, and gentamicin as a function of bacterial growth rate  
591 probed by *Escherichia coli* chromosome replication in the mouse peritonitis model.  
592 *Antimicrob Agents Chemother*.
- 593 26. Nakae R, Nakae T. 1982. Diffusion of aminoglycoside antibiotics across the outer  
594 membrane of *Escherichia coli*. *Antimicrob Agents Chemother*.
- 595 27. Sabeti Azad M, Okuda M, Cyrenne M, Bourge M, Heck MP, Yoshizawa S, Fourmy D.  
596 2020. Fluorescent Aminoglycoside Antibiotics and Methods for Accurately  
597 Monitoring Uptake by Bacteria. *ACS Infect Dis*.
- 598 28. Hartl FU, Hayer-Hartl M. 2002. Protein folding. Molecular chaperones in the cytosol:  
599 From nascent chain to folded protein. *Science (80- )* 295:1852–1858.
- 600 29. Goltermann L, Good L, Bentin T. 2013. Chaperonins fight aminoglycoside-induced  
601 protein misfolding and promote short-term tolerance in *Escherichia coli*. *J Biol Chem*.
- 602 30. Chowdhury N, Kingston JJ, Brian Whitaker W, Carpenter MR, Cohen A, Fidelma Boyd  
603 E. 2014. Sequence and expression divergence of an ancient duplication of the  
604 chaperonin groESEL operon in *Vibrio* species. *Microbiol (United Kingdom)* 160:1953–  
605 1963.
- 606 31. Lo Scudato M, Blokesch M. 2012. The regulatory network of natural competence

- 607 and transformation of *Vibrio cholerae*. PLoS Genet.
- 608 32. Richter K, Haslbeck M, Buchner J. 2010. The Heat Shock Response: Life on the Verge  
609 of Death. Mol Cell.
- 610 33. Slamti L, Livny J, of bacteriology WMK. 2007. Global gene expression and phenotypic  
611 analysis of a *Vibrio cholerae* {rpoH} deletion mutant.
- 612 34. Fayet O, Ziegelhoffer T, Georgopoulos C. 1989. The groES and groEL heat shock gene  
613 products of *Escherichia coli* are essential for bacterial growth at all temperatures. J  
614 Bacteriol 171:1379–1385.
- 615 35. O’Neill J. 2015. Tackling a Crisis for the Health and Wealth of Nations. Rev Antimicrob  
616 Resist.
- 617 36. Magnet S, Blanchard JS. 2005. Molecular insights into aminoglycoside action and  
618 resistance. Chem Rev 105:477–497.
- 619 37. Baquero F, Levin BR. 2021. Proximate and ultimate causes of the bactericidal action  
620 of antibiotics. Nat Rev Microbiol.
- 621 38. Ezraty B, Vergnes A, Banzhaf M, Duverger Y, Huguenot A, Brochado AR, Su SY,  
622 Espinosa L, Loiseau L, Py B, Typas A, Barras F. 2013. Fe-S cluster biosynthesis controls  
623 uptake of aminoglycosides in a ROS-less death pathway. Science (80- ).
- 624 39. Bruni GN, Kralj JM. 2020. Membrane voltage dysregulation driven by metabolic  
625 dysfunction underlies bactericidal activity of aminoglycosides. Elife.
- 626 40. Zou J, Zhang W, Zhang H, Zhang XD, Peng B, Zheng J. 2018. Studies on aminoglycoside

- 627 susceptibility identify a novel function of KsgA to secure translational fidelity during  
628 antibiotic stress. *Antimicrob Agents Chemother* 62:1–13.
- 629 41. Shan Y, Lazinski D, Rowe S, Camilli A, Lewis K. 2015. Genetic basis of persister  
630 tolerance to aminoglycosides in *Escherichia coli*. *MBio* 6:1–10.
- 631 42. Allison KR, Brynildsen MP, Collins JJ. 2011. Metabolite-enabled eradication of  
632 bacterial persisters by aminoglycosides. *Nature*.
- 633 43. McKay SL, Portnoy DA. 2015. Ribosome hibernation facilitates tolerance of  
634 stationary-phase bacteria to aminoglycosides. *Antimicrob Agents Chemother*  
635 59:6992–6999.
- 636 44. Hall CW, Farkas E, Zhang L, Mah TF. 2019. Potentiation of Aminoglycoside Lethality  
637 by C4-Dicarboxylates Requires RpoN in Antibiotic-Tolerant *Pseudomonas aeruginosa*.  
638 *Antimicrob Agents Chemother*.
- 639 45. Ji X, Zou J, Peng H, Stolle AS, Xie R, Zhang H, Peng B, Mekalanos JJ, Zheng J. 2019.  
640 Alarmone Ap4A is elevated by aminoglycoside antibiotics and enhances their  
641 bactericidal activity. *Proc Natl Acad Sci U S A*.
- 642 46. Kumar CMS, Mande SC, Mahajan G. 2015. Multiple chaperonins in bacteria—novel  
643 functions and non-canonical behaviors. *Cell Stress Chaperones* 20:555–574.
- 644 47. Goyal K, Qamra R, Mande SC. 2006. Multiple gene duplication and rapid evolution in  
645 the groEL Gene: Functional implications. *J Mol Evol*.
- 646 48. Wang Y, Zhang W yan, Zhang Z, Li J, Li Z feng, Tan Z gao, Zhang T tian, Wu Z hong, Liu

- 647 H, Li Y zhong. 2013. Mechanisms Involved in the Functional Divergence of Duplicated  
648 GroEL Chaperonins in *Myxococcus xanthus* DK1622. *PLoS Genet*.
- 649 49. Casadesus J, Low D. 2006. Epigenetic Gene Regulation in the Bacterial World.  
650 *Microbiol Mol Biol Rev*.
- 651 50. Hernday AD, Braaten BA, Low DA. 2003. The mechanism by which DNA adenine  
652 methylase and PapI activate the Pap epigenetic switch. *Mol Cell*.
- 653 51. Cota I, Sánchez-Romero MA, Hernández SB, Pucciarelli MG, García-Del Portillo F,  
654 Casadesús J. 2015. Epigenetic Control of *Salmonella enterica* O-Antigen Chain Length:  
655 A Tradeoff between Virulence and Bacteriophage Resistance. *PLoS Genet*.
- 656 52. Wion D, Casadesús J. 2006. N6-methyl-adenine: an epigenetic signal for DNA-protein  
657 interactions. *Nat Rev Microbiol*.
- 658 53. Rausch C, Zhang P, Casas-Delucchi CS, Daiß JL, Engel C, Coster G, Hastert FD, Weber  
659 P, Cardoso MC. 2021. Cytosine base modifications regulate DNA duplex stability and  
660 metabolism. *Nucleic Acids Res*.
- 661 54. Dalia AB, Lazinski DW, Camilli A. 2013. Characterization of undermethylated sites in  
662 *vibrio cholerae*. *J Bacteriol*.
- 663 55. Haycocks JRJ, Warren GZL, Walker LM, Chlebek JL, Dalia TN, Dalia AB, Grainger DC.  
664 2019. The quorum sensing transcription factor AphA directly regulates natural  
665 competence in *Vibrio cholerae*. *PLoS Genet*.
- 666 56. LaRocque RC, Harris JB, Dziejman M, Li X, Khan AI, Faruque ASG, Faruque SM, Nair



- 667 GB, Ryan ET, Qadri F, Mekalanos JJ, Calderwood SB. 2005. Transcriptional profiling of  
668 *Vibrio cholerae* recovered directly from patient specimens during early and late  
669 stages of human infection. *Infect Immun*.
- 670 57. Baharoglu Z, Krin E, Mazel D. 2012. Connecting environment and genome plasticity  
671 in the characterization of transformation-induced {SOS} regulation and carbon  
672 catabolite control of the *Vibrio cholerae* integron integrase. *J Bacteriol* 194:1659–  
673 1667.
- 674 58. Baharoglu Z, Krin E, Mazel D. 2013. RpoS Plays a Central Role in the SOS Induction by  
675 Sub-Lethal Aminoglycoside Concentrations in *Vibrio cholerae*. *PLoS Genet*.
- 676 59. Val ME, Skovgaard O, Ducos-Galand M, Bland MJ, Mazel D. 2012. Genome  
677 engineering in *Vibrio cholerae*: A feasible approach to address biological issues. *PLoS*  
678 *Genet*.
- 679 60. Name P, Date R. 2010. Methods for Dilution Antimicrobial Susceptibility tests for  
680 Bacteria that Grow Aerobically; Approved Standard- Seventh Edition. *Clin Lab Stand*  
681 *Inst*.
- 682 61. Lang M, Krin E, Korlowski C, Sismeiro O, Varet H, Coppée J-Y, Mazel D, Baharoglu Z.  
683 2020. Sleeping ribosomes: bacterial signaling triggers RaiA mediated persistence to  
684 aminoglycosides. *bioRxiv* 2020.11.27.401281.
- 685 62. Baharoglu Z, Bikard D, Mazel D. 2010. Conjugative {DNA} transfer induces the  
686 bacterial {SOS} response and promotes antibiotic resistance development through  
687 integron activation. *{PLoS} Genet* 6:e1001165.

688 63. Krin E, Pierlé SA, Sismeiro O, Jagla B, Dillies MA, Varet H, Irazoki O, Campoy S, Rouy  
689 Z, Cruveiller S, Médigue C, Coppée JY, Mazel D. 2018. Expansion of the SOS regulon  
690 of *Vibrio cholerae* through extensive transcriptome analysis and experimental  
691 validation. BMC Genomics.

692

693

## 694 **SUPPORTING INFORMATION**

695 **S1 Table. Differentially regulated genes in  $\Delta vchM$  strain**

696 **S2 Table. Strains, plasmids and primers used in this study**

697 **S3 Table. Primer and probe sequences used in digital qRT-PCR**

698 **S1 Fig. Neo-cy5 uptake is not increased in  $\Delta vchM$ .** Percentage of neo-cy5 positive cells  
699 analyzed by flow cytometry after incubation with fluorescent marked neomycin. Means and  
700 SD are represented, n=3.

701 **S2 Fig. Comparison of GroESL proteins from *E. coli* and *V. cholerae*.** Amino acid identity  
702 between GroES and GroEL proteins of *E. coli* MG1655 (*Eco*) and *V. cholerae* O1 El Tor  
703 N16961 (*Vch*) computed by BLASTP. Values represent percentage identity between  
704 proteins.

705 **S3 Fig. Deletion of *groESL-2* does not increase susceptibility to tobramycin. A.** *In vitro*  
706 competitions of WT and  $\Delta groESL-2$  strains against isogenic  $\Delta lacZ$  reference strain in absence  
707 or presence of tobramycin (TOB) at 0.6  $\mu\text{g/ml}$ ; n=3, error bars indicate SD. **B.** Survival of

708 stationary-phase WT and  $\Delta groESL-2$  cells exposed to 20X MIC of tobramycin. n=3, error  
709 bars indicate SD.

710 **S4 Fig. Mutation of VchM sites in *groESL-2* region fails to affect gene expression of the**  
711 **operon in absence of VchM.** Relative expression of *groES-2* and *groEL-2* genes in the  
712 indicated strains grown at OD<sub>600</sub> 1.0. n=3, error bars indicate SD.

713 **S5 Fig. Overexpression of *groESL-2* in the WT does not increase tolerance to tobramycin.**  
714 Survival (after 7 hours TOB treatment) of WT strain carrying a control plasmid or a plasmid  
715 overexpressing *groESL-2* genes. n=6, error bars indicate SD.

716

717

718 **Figure 1.**

**A**

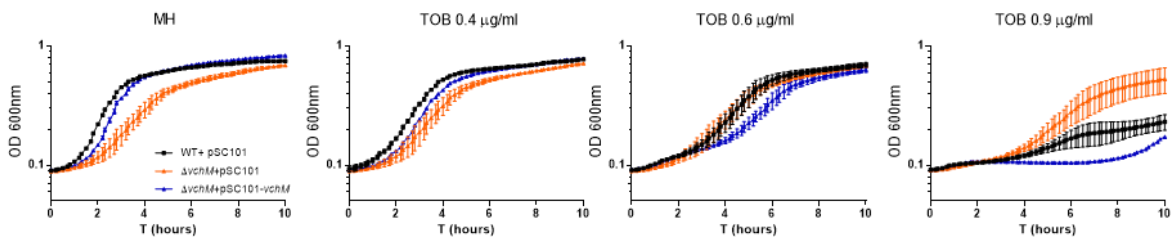

**B**

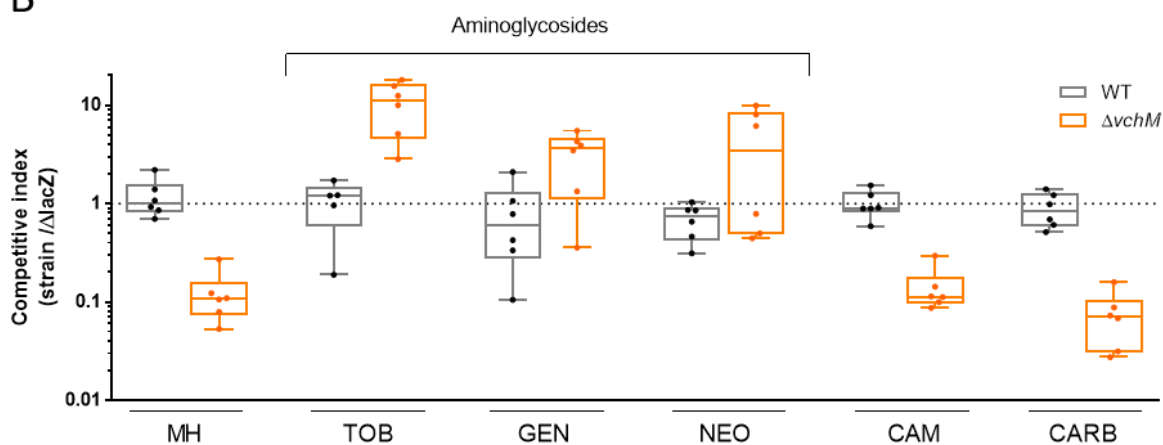

719

720 **Figure 2.**

721

**A**

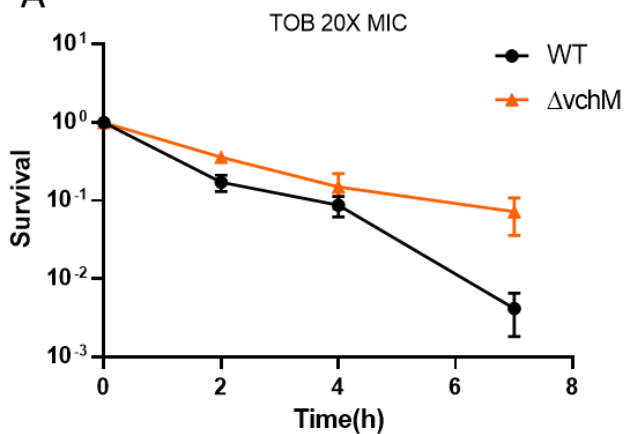

**B**

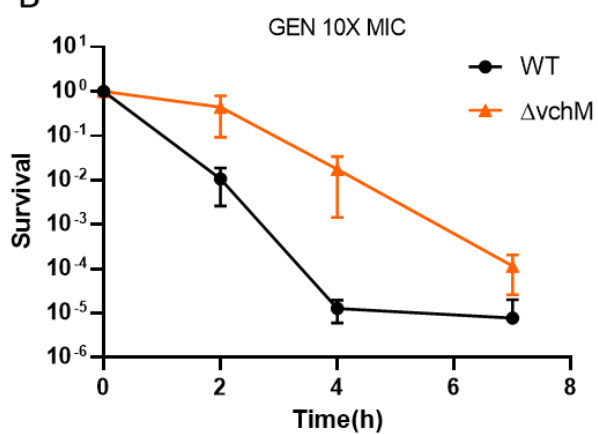

722

723

724 **Figure 3**

725

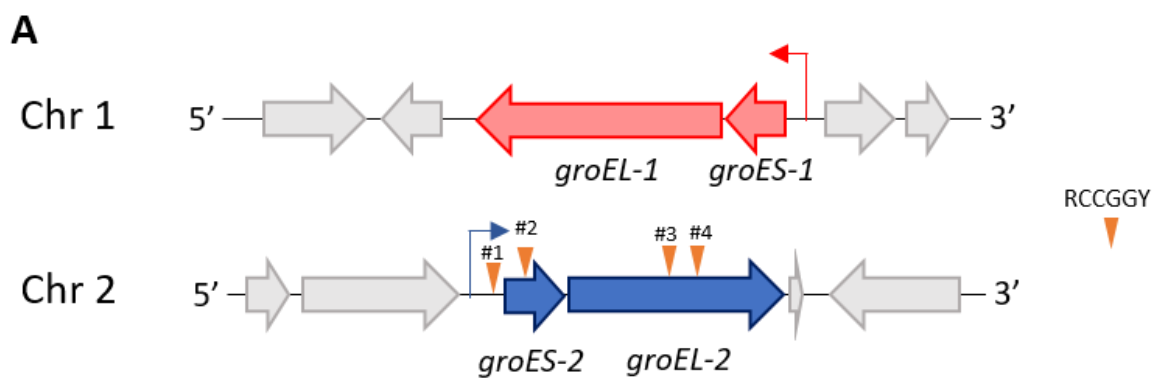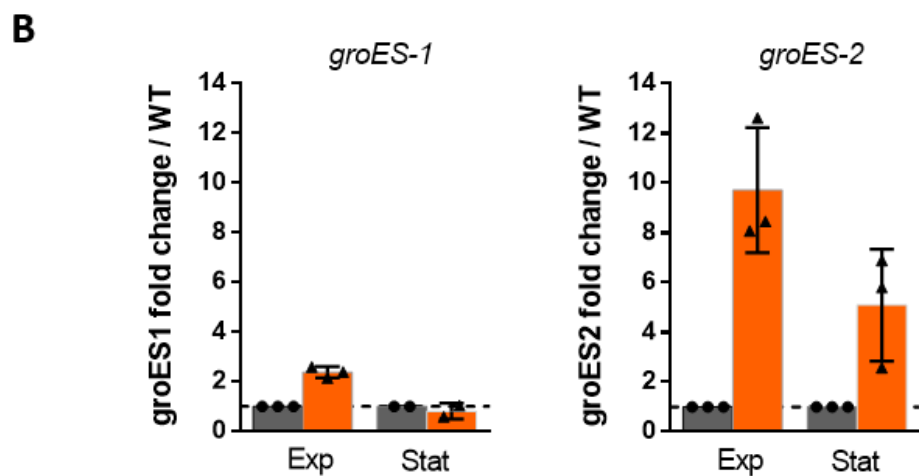

726

727

728

729

730

731

732

733

734

735 **Figure 4**

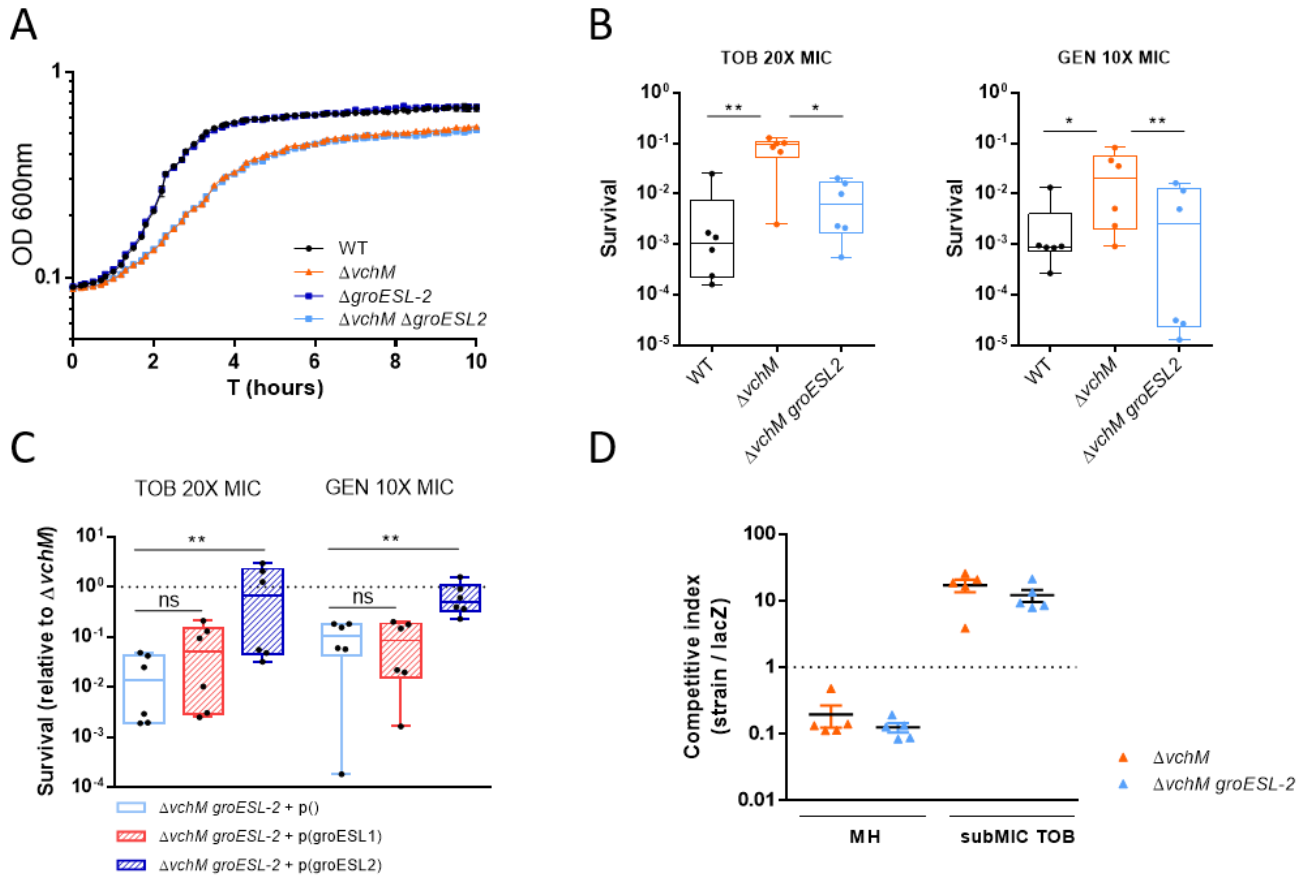

736

737

738

739

740

741

742

743

744

745

746

747 **Figure 5**

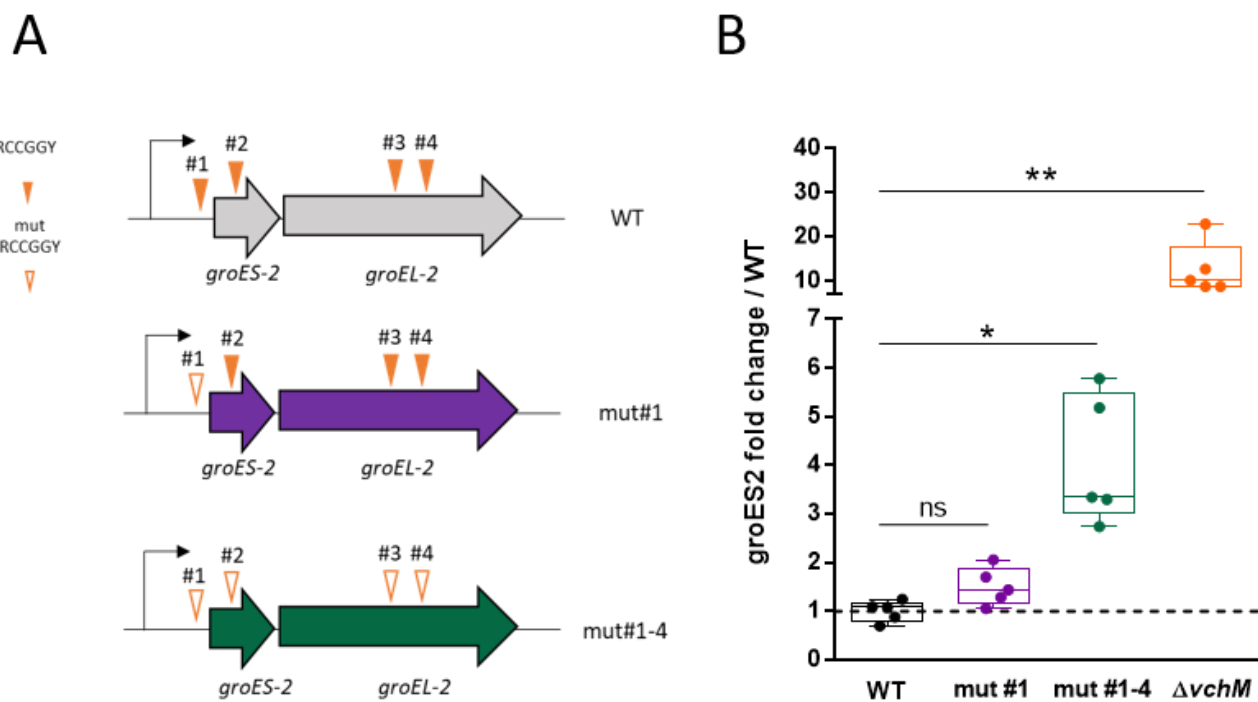

748
